# Supplementary material for: MicroRNA regulation in human CD8+ T cell subsets – cytokine exposure alone drives miR-146a expression
Source: J Transl Med. 2014 Oct 21;12:292. doi: 10.1186/s12967-014-0292-0 (PMC4219087; doi:10.1186/s12967-014-0292-0)
Supplement: Additional file 2: — miRNAs expressed in CD8+ T cell subsets. The average expression of miRNAs in individual CD8+ T cell subsets from 3 donors is shown with a normalised log2 fluorescence value > 4.0. Data is derived from Affymetrix microarray experiments. [file 12967_2014_292_MOESM2_ESM.xlsx]

## Sheet: Sheet1
		miRNA microarray data
		Average expression data over 3 donors
ID		Naïve	Tcm	Tem
hsa-miR-150		13.0833	12.0087	12.0246
hsa-miR-342-3p		12.5486	10.9487	11.2605
hsa-miR-768-5p		12.2784	11.3161	12.173
hsa-miR-26a		12.1631	11.4021	11.2604
hsa-miR-92a		10.9193	9.14402	9.26503
hsa-miR-1826		10.5955	10.3037	10.2264
hsa-let-7b		10.4841	9.73587	10.0096
hsa-miR-16		10.2709	10.6053	11.1651
hsa-miR-181a		10.052	7.64866	8.10976
hsa-miR-17		9.96785	8.95676	9.09455
hsa-miR-768-3p		9.92392	9.30114	9.51363
hsa-miR-103		9.86303	9.7709	10.0144
hsa-miR-20a		9.72748	9.08359	8.61093
hsa-miR-320a		9.66435	8.41484	8.61413
hsa-miR-140-3p		9.66186	9.3508	9.51753
hsa-miR-320b		9.59303	8.42579	8.48672
hsa-miR-107		9.5748	9.52017	9.71064
hsa-miR-106a		9.48536	8.6093	8.73287
hsa-miR-320c		9.47591	8.24154	8.577
hsa-let-7a		9.45525	9.34851	9.19922
hsa-miR-191		9.31629	9.23772	9.84702
hsa-miR-19b		9.2006	8.97442	8.46935
hsa-miR-29a		9.12901	9.8108	9.45261
hsa-let-7d		9.03087	8.46379	8.85091
hsa-miR-31		9.0294	8.9076	6.26488
hsa-miR-146b-5p		8.87466	5.36156	6.22324
hsa-miR-923		8.83593	9.77715	9.30634
hsa-miR-24		8.50347	9.42815	10.3438
hsa-miR-638		8.48148	9.01111	9.73041
hsa-let-7c		8.4255	7.75629	7.72077
hsa-miR-222		8.15058	9.45507	9.17851
hsa-miR-342-5p		8.10485	6.47037	6.91626
hsa-let-7i		8.04692	8.87594	8.60687
hsa-miR-106b		7.9835	7.41875	7.80653
hsa-miR-23a		7.95783	9.33439	9.88352
hsa-miR-93		7.86094	6.75728	7.6684
hsa-let-7g		7.80985	7.71654	7.07091
hsa-miR-320d		7.73118	6.4171	6.14393
hsa-miR-181b		7.41165	5.98455	6.23249
hsa-miR-30b		7.18909	6.15704	5.67302
hsa-miR-361-5p		7.13472	5.88458	6.38467
hsa-miR-20b		7.06768	5.11549	4.89302
hsa-miR-155		6.93925	7.7577	8.03246
hsa-miR-194		6.92594	5.71846	5.87075
hsa-miR-185		6.87603	6.71866	6.90913
hsa-miR-378		6.8456	3.36628	3.68648
hsa-miR-1207-5p		6.83367	7.45297	7.37239
hsa-miR-20a-star		6.79597	7.22457	6.73429
hsa-miR-30c		6.79393	6.23192	6.21099
hsa-miR-25		6.78203	5.69929	6.26888
hsa-miR-335		6.71256	7.52897	6.89312
hsa-miR-425		6.68296	5.98029	7.13682
hsa-miR-15b		6.61177	6.79493	6.74138
hsa-miR-221		6.59207	8.26251	7.60867
hsa-miR-1275		6.58626	4.70068	5.94913
hsa-miR-1228-star		6.44896	7.1462	8.04677
hsa-miR-149-star		6.35658	6.05211	7.97261
hsa-miR-339-3p		6.35499	5.13599	5.75228
hsa-miR-423-3p		6.30574	4.6093	5.69891
hsa-miR-574-3p		6.19061	6.44834	6.0279
hsa-miR-30d		6.17566	5.04462	4.96028
hsa-miR-23b		6.12413	5.41476	6.7736
hsa-miR-27a		6.09227	6.55768	7.79282
hsa-miR-210		6.05157	3.87945	3.83265
hsa-miR-1281		5.96255	7.14674	5.49267
hsa-miR-30e		5.93516	5.11256	4.51961
hsa-miR-423-5p		5.87256	3.42643	5.19271
hsa-miR-1268		5.85869	5.71248	6.0924
hsa-miR-548a-3p		5.80287	6.49339	4.59536
hsa-miR-874		5.5024	3.08832	2.73267
hsa-miR-125a-5p		5.4211	4.49071	6.08635
hsa-miR-17-star		5.26803	3.00753	3.90473
hsa-miR-146a		5.26004	9.43467	7.39092
hsa-miR-652		5.16641	3.62335	4.64126
hsa-miR-192		5.16106	4.18681	3.62606
hsa-miR-148a-star		5.15953	5.04275	4.81419
hsa-miR-663		4.91828	5.98497	7.20991
hsa-miR-151-5p		4.78797	2.73952	1.96086
hsa-miR-324-3p		4.77298	2.94692	3.90796
hsa-miR-34b		4.76624	4.38155	4.51258
hsa-miR-625		4.73169	3.26293	3.15199
hsa-miR-22		4.72754	5.94279	7.99633
hsa-miR-1264		4.72601	4.67762	4.47414
hsa-miR-197		4.57799	3.85028	4.4022
hsa-miR-1825		4.50098	4.87934	4.26471
hsa-miR-339-5p		4.46305	3.14998	3.73095
hsa-miR-1183		4.45424	5.60275	4.98691
hsa-miR-455-3p		4.40447	4.49834	4.0962
hsa-miR-181c		4.35693	1.75994	2.02863
hsa-miR-502-3p		4.30846	2.39157	3.3649
hsa-let-7f		4.27572	3.45802	3.66442
hsa-miR-1271		4.26244	2.07043	3.60048
hsa-miR-1282		4.23673	3.25477	3.82728
hsa-miR-18a		4.20972	3.36991	3.90017
hsa-miR-200c		4.08853	2.3611	2.4411
hsa-miR-28-5p		4.06029	4.43534	5.36487
hsa-miR-106b-star		4.05145	3.02618	3.50069
hsa-miR-29c		4.04545	2.63484	2.97452
hsa-miR-146b-3p		3.98566	2.68683	2.49019
hsa-miR-130b		3.9794	3.16213	4.06317
hsa-miR-1280		3.97656	4.66321	4.30914
hsa-miR-574-5p		3.80016	3.06585	4.36068
hsa-miR-28-3p		3.76384	3.55638	4.60711
hsa-miR-1234		3.66422	4.34771	4.29
hsa-miR-605		3.43066	3.37925	4.11384
hsa-miR-576-3p		3.34661	2.74753	4.14815
hsa-miR-885-5p		3.34572	4.18701	3.57534
hsa-miR-940		3.20964	4.12456	3.50825
hsa-miR-483-5p		3.07058	4.37459	3.617
hsa-miR-129-star		3.0588	3.24706	4.46422
hsa-miR-15a		2.74709	3.40097	5.59809
hsa-miR-129-3p		2.13723	2.82211	4.31293
